# Supplementary material
Source: PubMed Central journal article supplement (PMC3012452)
Supplement: NIHMS31681-supplement-1.pdf [file NIHMS31681-supplement-1.pdf]

# Supplementary Data A

The signaling map is composed of three modules (Fig. 1): the Wnt signaling module, the ERK signaling module, and the gene regulation module.

## **The ERK and Wnt signaling pathway modules (green and blue boxes in Fig. 1)**

The ERK signaling pathway is well described in various cell types (1-3). As shown in the upper left green box in Fig. 1, it is initiated by the growth factor induced recruitment of the SOS/Grb2 complex to the plasma membrane. The SOS/Grb2 complex (x18) catalyzes the transformation of an inactive GDP-bound form (x19) of Ras (Ras-GDP) into its active GTP-bound form (Ras-GTP) (x20) (process v28). Ras-GTP binds the Raf-1 kinase (x21) with high affinity, which induces the recruitment of Raf-1 from the cytosol to the cell membrane and activates it (process v30). Activated Raf-1 (x22) phosphorylates and activates MEK (x23) (process v32), a kinase that in turn phosphorylates and activates ERK (x25) (process v34). Activated ERK (x26) can translocate to the nucleus and regulate gene expression by the phosphorylation of transcription factors including Snail (x30) and Slug (x31) (processes v42&44). The ERK signaling pathway includes a negative feedback loop (NFL) formed by dissociation of the SOS/Grb2 complex through ERK mediated phosphorylation (process v24), and multiple positive feedback loops (PFLs) formed by regulations of RKIP (x27) and GSK3 $\beta$  (x5) through active ERK. As shown in the upper right blue box in Fig. 1, the canonical Wnt signaling pathway is initiated by Wnt binding to Frizzled (process v1). The activation of Disheveled (x2) by Frizzled inhibits phosphorylation of the adenomatous polyposis coli (APC) protein (x8) and Axin (x13) by GSK3 $\beta$ . This disassembles the destruction core complex (x4) composed of APC, Axin, and GSK3 $\beta$  (process v3). This destruction complex plays a role in ubiquitination and degradation of  $\beta$ -catenin (process v10), and its inhibition leads to the accumulation of  $\beta$ -catenin in the nucleus (process v16). The Wnt signaling pathway module also includes one NFL formed by expression of Axin (process v23) by the  $\beta$ -catenin/TCF complex (x15).

## **Gene transcriptional regulation module (orange box in Fig. 1)**

Snail and Slug belong to the family of zinc finger-containing transcriptional repressors and their expression is regulated by multiple levels of protein interaction and post-translational modifications (4-7). Recent experimental results showed that Snail is regulated by GSK3 $\beta$

mediated phosphorylation on two distinct motifs (8). As shown in the lower orange box in Fig. 1, phosphorylation of the first motif directs Snail ubiquitination and proteolytic degradation (process v43), and the phosphorylation of the second motif directs nuclear export of Snail and thereby inhibition of its transcriptional regulation (process v19&38). Recently, Peiro *et al.* (9) showed that Snail induced by active ERK inhibits its own expression (process v42) through binding to an E-box in its promoter and repressing its activity. On the other hand, Sakai *et al.* reported that Slug activates its own promoter (process v47) (10). Based on the diagrammatic interaction map, we developed a mathematical model composed of the ERK and Wnt signaling pathway modules and the gene transcriptional regulation module. For details on the mathematical modeling, see Materials and methods and Supplementary Data A.

### **Mathematical modeling and model reduction**

By integrating available information about protein interactions and regulations in the ERK and Wnt signaling pathways, we constructed first a diagrammatic interaction map (Fig. 1), which provided the basis for the further development of a mathematical model. We then used the law of mass action, Michaelis-Menten equations, and Hill equations depending on the reaction characteristics to obtain the ordinary differential equation (ODE) model (see below for details). This model includes the ERK and Wnt signaling pathway modules and the gene regulation module as described in the Results section. Specifically, the activation and deactivation of signaling proteins in the ERK pathway module are described by first order rate equations; protein interactions in the Wnt pathway module are described by molecular association/dissociation or stoichiometric conversions; the gene transcriptional regulation module is described by Hill equations. The mathematical model was then reduced by utilizing biological constraints such as mass conservation and rapid equilibrium condition, by which kinetic parameters were converted into measurable ones.

### **Modeling of the Wnt signaling module**

Using the law of mass action, we can describe the mathematical model of the Wnt signaling module (Fig. 1) as follows (this will be further simplified by considering some biological constraints).

$$\frac{dX_1}{dt} = -v_1 + v_2 \tag{S.1}$$

$$\frac{dX_2}{dt} = v_1 - v_2 \quad (\text{S.2})$$

$$\frac{dX_3}{dt} = v_4 - v_5 - v_8 + v_{10} \quad (\text{S.3})$$

$$\frac{dX_4}{dt} = -v_3 - v_4 + v_5 + v_6 \quad (\text{S.4})$$

$$\frac{dX_5}{dt} = v_3 - v_6 - v_{21} + v_{22} \quad (\text{S.5})$$

$$\frac{dX_6}{dt} = v_{21} - v_{22} \quad (\text{S.6})$$

$$\frac{dX_7}{dt} = v_3 - v_6 + v_7 \quad (\text{S.7})$$

$$\frac{dX_8}{dt} = -v_7 - v_{17} \quad (\text{S.8})$$

$$\frac{dX_9}{dt} = v_8 - v_9 \quad (\text{S.9})$$

$$\frac{dX_{10}}{dt} = v_9 - v_{10} \quad (\text{S.10})$$

$$\frac{dX_{11}}{dt} = v_{10} - v_{11} \quad (\text{S.11})$$

$$\frac{dX_{12}}{dt} = -v_8 + v_{12} - v_{13} - v_{16} - v_{17} \quad (\text{S.12})$$

$$\frac{dX_{13}}{dt} = -v_7 + v_{14} - v_{15} + v_{23} \quad (\text{S.13})$$

$$\frac{dX_{14}}{dt} = -v_{16} \quad (\text{S.14})$$

$$\frac{dX_{15}}{dt} = v_{16} \quad (\text{S.15})$$

$$\frac{dX_{16}}{dt} = v_{17} \quad (\text{S.16})$$

$$\frac{dX_{17}}{dt} = -v_{18} + v_{19} + v_{20} \quad (\text{S.17})$$

where  $v_i (1 \leq i \leq 23)$  represent the processes shown in Fig. 1 and Table S1.

### Model reduction

Using mass conservation, we can reduce the ODE system (S.1)~(S.17) as described in the following Step 1.

**Step 1. Mass conservation.**

Proteins Dsh, TCF, GSK3 $\beta$ , APC,  $\beta$ -catenin, Axin, and E-cadherin comprise  $X_i(1 \leq i \leq 17)$  in which the concentrations of  $\beta$ -catenin\* ( $X_{11}$ ),  $\beta$ -catenin ( $X_{12}$ ), Axin ( $X_{13}$ ), and E-cadherin ( $X_{17}$ ) are assumed to change by regulation of various signaling proteins. However, the total concentrations of Dsh, TCF, GSK3 $\beta$  and APC would remain constant throughout the time course of oncogenic stimuli (EGF and Wnt) since they are stable proteins (11). Thus the mass conservation equations for  $X_i(1 \leq i \leq 17, i \neq 11, 12, 13, 17)$  can be constructed as follows:

$$X_1 + X_2 = Dsh^0 \quad (S.18)$$

$$X_{14} + X_{15} = TCF^0 \quad (S.19)$$

$$X_3 + X_4 + X_5 + X_6 + X_9 + X_{10} = GSK3\beta^0 \quad (S.20)$$

$$X_3 + X_4 + X_7 + X_8 + X_9 + X_{10} + X_{16} = APC^0 \quad (S.21)$$

The superscript “0” denotes the total concentration of each protein. From Eqs. (S.18)-(S.19), we have the following algebraic equations:

$$X_1 = Dsh^0 - X_2 \quad (S.22)$$

$$X_{14} = TCF^0 - X_{15} \quad (S.23)$$

Since the total concentration of Axin is negligible compared to APC,  $\beta$ -catenin, GSK3 $\beta$  and GSK3 $\beta$ \* (phosphorylated GSK3 $\beta$ ) (11), the state variables  $X_5$  and  $X_8$  in (S.20) and (S.21) can be represented as functions of  $X_6$  and  $X_{16}$ , respectively:

$$X_5 = GSK3\beta^0 - X_6 \quad (S.24)$$

$$X_8 = APC^0 - X_{16} \quad (S.25)$$

Thus, the state variables  $X_i(i=1,5,8,14)$  can be obtained from (S.22), (S.23), (S.24), and (S.25) and the ODEs (S.1), (S.5), (S.8), and (S.14) can be eliminated from the ODEs.

Some of the remaining ODEs can be further reduced by considering the rapid equilibrium condition of fast processes as described in the following Step 2 through Step 4.

**Step 2. The rapid equilibrium condition of fast processes.**

Let us consider the association/dissociation of APC and Axin ( $v_7$ ),  $\beta$ -catenin and destruction complex ( $v_8$ ), TCF and  $\beta$ -catenin ( $v_{16}$ ), and APC and  $\beta$ -catenin ( $v_{17}$ ) in rapid

equilibrium status. At this rapid equilibrium condition, we can have the following approximations of those fast processes:

$$v_7 = v_8 = v_{16} = v_{17} \approx 0 \quad (\text{S.26})$$

Note that the association of  $GSK3\beta$  and the APC/Axin complex ( $v_6$ ) can be considered as a slow process since Dsh-mediated  $GSK3\beta$  release from the destruction complex ( $v_3$ ) is assumed to be slow (see Fig. 1). From these approximations (S.26), we can derive the following four algebraic equations:

$$X_7 = \frac{X_8 X_{13}}{K_{813}} + \varepsilon_7 \quad (\text{S.27})$$

$$X_9 = \frac{X_3 X_{12}}{K_{312}} + \varepsilon_9 \quad (\text{S.28})$$

$$X_{15} = \frac{X_{12} X_{14}}{K_{1214}} + \varepsilon_{15} \quad (\text{S.29})$$

$$X_{16} = \frac{X_8 X_{12}}{K_{812}} + \varepsilon_{16} \quad (\text{S.30})$$

where  $\varepsilon_i$  ( $i=7,9,15,16$ ) denote error terms and  $K_\xi = \frac{k_{d\xi}}{k_{a\xi}}$  ( $\xi = 813, 312, 1214, 812$ ) indicate the binding affinities as shown in Table S2.

**Step 3.** Elimination of the fast processes  $v_i$  ( $i=7,8,16,17$ ) in the ODEs.

**Step 3-1.** Representation of the fast processes by using (S.7), (S.9), (S.15) and (S.16).

Substituting four algebraic equations (S.27)~(S.30) into (S.7), (S.9), (S.15) and (S.16), respectively, and rearranging the results for  $v_i$  ( $i=7,8,16,17$ ), we obtain

$$v_7 = \frac{dX_7}{dt} - v_3 + v_6 = \frac{d}{dt} \left( \frac{X_8 X_{13}}{K_{813}} + \varepsilon_7 \right) - v_3 + v_6$$

$$v_8 = \frac{dX_9}{dt} + v_9 = \frac{d}{dt} \left( \frac{X_3 X_{12}}{K_{312}} + \varepsilon_9 \right) + v_9$$

$$v_{16} = \frac{dX_{15}}{dt} = \frac{d}{dt} \left( \frac{X_{12} X_{14}}{K_{1214}} + \varepsilon_{15} \right)$$

$$v_{17} = \frac{dX_{16}}{dt} = \frac{d}{dt} \left( \frac{X_8 X_{12}}{K_{812}} + \varepsilon_{16} \right)$$

**Step 3-2.** Elimination of  $v_i$  ( $i=7,8,16,17$ ) in the ODEs .

Substituting  $v_i (i = 7, 8, 16, 17)$  obtained from Step 3-1 into the ODEs other than (S.7), (S.9), (S.15) and (S.16), we obtain the following equations:

$$\frac{dX_3}{dt} = v_4 - v_5 - v_8 + v_{10} = v_4 - v_5 - \left\{ \frac{d}{dt} \left( \frac{X_3 X_{12}}{K_{312}} + \varepsilon_9 \right) + v_9 \right\} + v_{10} \quad (\text{S.31})$$

$$\begin{aligned} \frac{dX_{12}}{dt} &= -v_8 + v_{12} - v_{13} - v_{16} - v_{17} - v_{18} \\ &= - \left\{ \frac{d}{dt} \left( \frac{X_3 X_{12}}{K_{312}} + \varepsilon_9 \right) + v_9 \right\} + v_{12} - v_{13} - \frac{d}{dt} \left( \frac{X_{12} X_{14}}{K_{1214}} + \varepsilon_{15} \right) - \frac{d}{dt} \left( \frac{X_8 X_{12}}{K_{812}} + \varepsilon_{16} \right) - v_{18} \end{aligned} \quad (\text{S.32})$$

$$\frac{dX_{13}}{dt} = -v_7 + v_{14} - v_{15} + v_{24} = - \left\{ \frac{d}{dt} \left( \frac{X_8 X_{13}}{K_{813}} + \varepsilon_7 \right) - v_3 + v_6 \right\} + v_{14} - v_{15} + v_{24} \quad (\text{S.33})$$

**Step 4.** Construction of algebraic equations and an ODE system to find state variables other than  $X_i (i = 1, 5, 8, 14)$ .

Assuming error terms  $\varepsilon_i = 0 (i = 7, 9, 15, 16)$ , the four state variables  $X_i (i = 7, 9, 15, 16)$  can be represented as functions of other variables:

$$X_7 = \frac{X_8 X_{13}}{K_{813}}. \quad (\text{S.34})$$

$$X_9 = \frac{X_3 X_{12}}{K_{312}}. \quad (\text{S.35})$$

$$X_{15} = \frac{X_{12} X_{14}}{K_{1214}}. \quad (\text{S.36})$$

$$X_{16} = \frac{X_8 X_{12}}{K_{812}}. \quad (\text{S.37})$$

Thus, (S.7), (S.9), (S.15), and (S.16) can be eliminated from the ODEs and can be replaced by the algebraic equations (S.34)~(S.37), respectively.

Therefore, the remaining nine state variables  $X_i (i = 2, 3, 4, 6, 10, 11, 12, 13, 17)$  can be obtained by solving the ODE system (S.2), (S.31), (S.4), (S.6), (S.10), (S.11), (S.32), (S.33), and (S.17)

with  $\varepsilon_i = 0 (i = 7, 9, 15, 16)$ : the system is linear with respect to  $\frac{dX_i}{dt} (i = 2, 3, 4, 6, 10, 11, 12, 13, 17)$ .

### Modeling of the ERK signaling module:

$$\frac{dX_{18}}{dt} = v_{24} - v_{25} \quad (\text{S.38})$$

$$\frac{dX_{19}}{dt} = v_{26} - v_{27} \quad (\text{S.39})$$

$$\frac{dX_{20}}{dt} = v_{28} - v_{29} \quad (\text{S.40})$$

$$\frac{dX_{21}}{dt} = -v_{30} + v_{31} \quad (\text{S.41})$$

$$\frac{dX_{22}}{dt} = v_{30} - v_{31} \quad (\text{S.42})$$

$$\frac{dX_{23}}{dt} = -v_{32} + v_{33} \quad (\text{S.43})$$

$$\frac{dX_{24}}{dt} = v_{32} - v_{33} \quad (\text{S.44})$$

$$\frac{dX_{25}}{dt} = -v_{34} + v_{35} \quad (\text{S.45})$$

$$\frac{dX_{26}}{dt} = v_{34} - v_{35} \quad (\text{S.46})$$

$$\frac{dX_{27}}{dt} = v_{38} - v_{39} \quad (\text{S.47})$$

$$\frac{dX_{28}}{dt} = v_{36} - v_{37} \quad (\text{S.48})$$

$$\frac{dX_{29}}{dt} = v_{40} - v_{41} \quad (\text{S.49})$$

### Modeling of gene regulation module:

$$\frac{dX_{30}}{dt} = v_{42} - v_{43} \quad (\text{S.50})$$

$$\frac{dX_{31}}{dt} = v_{44} + v_{45} - v_{46} + v_{47} \quad (\text{S.51})$$

**Supplemental Table S1.** Each reaction process in the mathematical model.

| No | Description                                                                                   | Equation                                                                                                        |
|----|-----------------------------------------------------------------------------------------------|-----------------------------------------------------------------------------------------------------------------|
| 1  | Activation of Dsh by Wnt                                                                      | $v_1 = k_{a1w} X_1 [Wnt]$                                                                                       |
| 2  | Deactivation of Dsh                                                                           | $v_2 = k_{d1w} X_2$                                                                                             |
| 3  | Dsh-mediated GSK3 $\beta$ release from the destruction complex (i.e., APC/Axin/GSK3 $\beta$ ) | $v_3 = k_{c24} X_2 X_4$                                                                                         |
| 4  | Phosphorylation of the destruction complex                                                    | $v_4 = k_{c43} X_4$                                                                                             |
| 5  | Dephosphorylation of the destruction complex                                                  | $v_5 = k_{c34} X_3$                                                                                             |
| 6  | Association between GSK3 $\beta$ and the APC/Axin complex                                     | $v_6 = k_{a57} X_5 X_7 - k_{d57} X_4$                                                                           |
| 7  | Association between APC and Axin                                                              | $v_7 = k_{a813} X_8 X_{13} - k_{d813} X_7$                                                                      |
| 8  | Association between $\beta$ -catenin and the destruction complex                              | $v_8 = k_{a312} X_3 X_{12} - k_{d312} X_9$                                                                      |
| 9  | Phosphorylation of $\beta$ -catenin through the destruction complex                           | $v_9 = k_{c910} X_9$                                                                                            |
| 10 | Release of phosphorylated $\beta$ -catenin from the destruction complex                       | $v_{10} = k_{c10} X_{10}$                                                                                       |
| 11 | Ubiquitination and degradation of phosphorylated $\beta$ -catenin                             | $v_{11} = k_{u11} X_{11}$                                                                                       |
| 12 | Synthesis of $\beta$ -catenin                                                                 | $v_{12} = \text{constant}$                                                                                      |
| 13 | Basal degradation of $\beta$ -catenin                                                         | $v_{13} = k_{u12} X_{12}$                                                                                       |
| 14 | Synthesis of Axin                                                                             | $v_{14} = \text{constant}$                                                                                      |
| 15 | Basal degradation of Axin                                                                     | $v_{15} = k_{u13} X_{13}$                                                                                       |
| 16 | Association between $\beta$ -catenin and TCF                                                  | $v_{16} = k_{a1214} X_{12} X_{14} - k_{d1214} X_{15}$                                                           |
| 17 | Association between $\beta$ -catenin and APC                                                  | $v_{17} = k_{a812} X_8 X_{12} - k_{d812} X_{16}$                                                                |
| 18 | Basal degradation of E-cadherin                                                               | $v_{18} = k_{u17} X_{17}$                                                                                       |
| 19 | Repression of the E-cadherin transcription by Snail and inhibition of Snail by GSK3 $\beta$   | $v_{19} = \frac{V_{19}}{1 + \frac{\frac{X_{30}}{k_{i530}}}{1 + \left(\frac{X_5}{k_{i530}}\right)^2} k_{i3017}}$ |



|    |                                                                                   |                                                                                                                               |
|----|-----------------------------------------------------------------------------------|-------------------------------------------------------------------------------------------------------------------------------|
| 20 | Repression of the E-cadherin transcription by Slug                                | $v_{20} = \frac{V_{20}}{1 + \left( \frac{X_{31}}{k_{i3117}} \right)^{1.2}}$                                                   |
| 21 | Phosphorylation of GSK3 $\beta$                                                   | $v_{21} = k_{c526} X_5 X_{26}$                                                                                                |
| 22 | Dephosphorylation of GSK3 $\beta$                                                 | $v_{22} = k_{r65} X_6$                                                                                                        |
| 23 | Transcription of Axin by the $\beta$ -catenin/TCF complex                         | $v_{23} = \frac{k_{ct1513} X_{15}}{k_{mt1513} + X_{15}}$                                                                      |
| 24 | Activation of the SOS/Grb2 complex and its inhibition by the active ERK           | $v_{24} = \frac{(k_{c18e} [EGF] + EGF_0) + k_{c1829} X_{29}}{1 + \left( \frac{X_{26}}{k_{i2618}} \right)}$                    |
| 25 | Deactivation of the SOS/Grb2 complex                                              | $v_{25} = k_{r18} X_{18}$                                                                                                     |
| 26 | Synthesis of Ras                                                                  | $v_{26} = \text{constant}$                                                                                                    |
| 27 | Degradation of Ras and inhibition by $\beta$ -catenin through LPDM                | $v_{27} = \frac{k_{u19} X_{t1}}{1 + \left( \frac{X_{15}}{k_{i1519}} \right)^2}$                                               |
| 28 | Activation of Ras by the active SOS/Grb2 complex                                  | $v_{28} = k_{c1819} X_{t1} X_{18}$                                                                                            |
| 29 | Deactivation of Ras                                                               | $v_{29} = v_{\max 20} X_{20}$                                                                                                 |
| 30 | Activation of Raf-1 by the active Ras                                             | $v_{30} = k_{c2021} X_{20} X_{t2}$                                                                                            |
| 31 | Deactivation of Raf-1                                                             | $v_{31} = v_{\max 22} X_{22}$                                                                                                 |
| 32 | Activation of MEK by active Raf-1 and inhibition by the phoshorylated RKIP        | $v_{32} = \frac{k_{c2223} X_{22} X_{t3}}{1 + \left( \frac{X_{t5} - X_{28}}{k_{i2327}} \right)^2}$                             |
| 33 | Deactivation of MEK                                                               | $v_{33} = v_{\max 24} X_{24}$                                                                                                 |
| 34 | Activation of ERK                                                                 | $v_{34} = k_{c2425} X_{t4} X_{25}$                                                                                            |
| 35 | Deactivation of ERK                                                               | $v_{35} = v_{\max 26} X_{26}$                                                                                                 |
| 36 | Phosphorylation of RKIP                                                           | $v_{36} = k_{c2627} (X_{t5} - X_{28}) X_{26}$                                                                                 |
| 37 | Dephosphorylation of RKIP                                                         | $v_{37} = v_{\max 28} X_{28}$                                                                                                 |
| 38 | Repression of RKIP transcription by Snail and inhibition of Snail by GSK3 $\beta$ | $v_{38} = \frac{V_{38}}{1 + \left( \frac{\frac{X_{30}}{1 + \left( \frac{X_5}{k_{i530}} \right)^2}}{k_{i3027}} \right)^{1.5}}$ |

|    |                                                           |                                                                                                                                                   |
|----|-----------------------------------------------------------|---------------------------------------------------------------------------------------------------------------------------------------------------|
| 39 | Basal degradation of RKIP                                 | $v_{39} = k_{u27} X_{15}$                                                                                                                         |
| 40 | Inhibition of the PKC $\delta$ activation by GSK3 $\beta$ | $v_{40} = \frac{V_{40}}{1 + \left(\frac{X_5}{k_{i529}}\right)^{2.5}}$                                                                             |
| 41 | Deactivation of PKC $\delta$                              | $v_{41} = k_{r29} X_{29}$                                                                                                                         |
| 42 | Transcription of Snail by active ERK                      | $v_{42} = \frac{k_{ct2630}}{\left(\left(\frac{k_{mt2630}}{X_{26}}\right)^{2.5} + 1\right)\left(\left(\frac{X_{30}}{k_{i30}}\right)^2 + 1\right)}$ |
| 43 | Degradation of Snail by GSK3 $\beta$ phosphorylation      | $v_{43} = \frac{k_{u530} X_{30}}{\left(\frac{k_{mu530}}{X_5}\right)^2 + 1}$                                                                       |
| 44 | Transcription of Slug by active ERK                       | $v_{44} = \frac{k_{ct2631}}{\left(\frac{k_{mt2631}}{X_{26}}\right)^{3.5} + 1}$                                                                    |
| 45 | Transcription of Slug by the $\beta$ -catenin/TCF complex | $v_{45} = \frac{k_{ct1531}}{\left(\frac{k_{mt1531}}{X_{15}}\right)^7 + 1}$                                                                        |
| 46 | Basal degradation of Slug                                 | $v_{46} = k_{u31} X_{31}$                                                                                                                         |
| 47 | Auto-activation of Slug                                   | $v_{47} = \frac{k_{c30}}{\left(\frac{k_{m30}}{X_{31}}\right)^3 + 1}$                                                                              |

**Supplementary Table S2.** Model parameters. Most of the reaction parameters used in the mathematical model were obtained or modified from the previous models (11-12) and those not available from the literature were estimated through iterative simulations such that they are qualitatively well in accord with the experimental evidences. In particular, the parameter estimates were carefully chosen such that they produce robust output profiles and meet the physical constraints found in other similar molecular reactions.

| Parameter          | Description                                       | Value [unit] | Sources |
|--------------------|---------------------------------------------------|--------------|---------|
| <b>Wnt pathway</b> |                                                   |              |         |
| $K_{812}$          | Binding affinity between $\beta$ -catenin and APC | 1200 [nM]    | (11)    |
| $K_{813}$          | Binding affinity between Axin and APC             | 50 [nM]      | (11)    |
| $K_{312}$          | Binding affinity between $\beta$ -catenin and the | 120 [nM]     | (11)    |

|             |                                                                                                                           |                                             |                    |
|-------------|---------------------------------------------------------------------------------------------------------------------------|---------------------------------------------|--------------------|
|             | destruction complex                                                                                                       |                                             |                    |
| $K_{1214}$  | Binding affinity between $\beta$ -catenin and TCF                                                                         | 50 [nM]                                     | Modified from (11) |
| $k_{a1w}$   | Rate constant for Dsh activation                                                                                          | 0.0091 [ $\text{min}^{-1}$ ]                | Modified from (11) |
| $k_{d1w}$   | Rate constant for Dsh deactivation                                                                                        | 1.82e-2 [ $\text{min}^{-1}$ ]               | (11)               |
| $k_{c24}$   | Rate constant for Dsh-mediated GSK3 $\beta$ release from the destruction complex (disassembly of the destruction complex) | 5e-2 [ $\text{nM}^{-1}\text{min}^{-1}$ ]    | (11)               |
| $k_{c43}$   | Rate constant for phosphorylation of the destruction complex                                                              | 0.267 [ $\text{min}^{-1}$ ]                 | (11)               |
| $k_{c34}$   | Rate constant for dephosphorylation of the destruction complex                                                            | 0.133 [ $\text{min}^{-1}$ ]                 | (11)               |
| $k_{a57}$   | Association rate constant between GSK3 $\beta$ and the APC/Axin complex                                                   | 9.09e-2 [ $\text{nM}\cdot\text{min}^{-1}$ ] | (11)               |
| $k_{d57}$   | Dissociation rate constant between GSK3 $\beta$ and the APC/Axin complex                                                  | 0.909 [ $\text{min}^{-1}$ ]                 | (11)               |
| $k_{c910}$  | Rate constant for the $\beta$ -catenin phosphorylation                                                                    | 206 [ $\text{min}^{-1}$ ]                   | (11)               |
| $k_{c10}$   | Rate constant for release of the phosphorylated $\beta$ -catenin release from the destruction complex                     | 206 [ $\text{min}^{-1}$ ]                   | (11)               |
| $k_{u11}$   | Degradation rate of the phosphorylated $\beta$ -catenin                                                                   | 0.417 [ $\text{min}^{-1}$ ]                 | (11)               |
| $v_{12}$    | Synthetic rate of $\beta$ -catenin                                                                                        | 0.423 [ $\text{nM}\cdot\text{min}^{-1}$ ]   | (11)               |
| $k_{u12}$   | Degradation rate of the non-phosphorylated $\beta$ -catenin                                                               | 2.57e-4 [ $\text{min}^{-1}$ ]               | (11)               |
| $v_{14}$    | Synthetic rate of Axin                                                                                                    | 8.22e-5 [ $\text{nM}\cdot\text{min}^{-1}$ ] | (11)               |
| $k_{u13}$   | Degradation rate of Axin                                                                                                  | 0.167 [ $\text{min}^{-1}$ ]                 | (11)               |
| $k_{u17}$   | Degradation rate of E-cadherin                                                                                            | 0.4636 [ $\text{min}^{-1}$ ]                | Estimated          |
| $V_{19}$    | Synthetic rate of Snail                                                                                                   | 4.457 [ $\text{nM}\cdot\text{min}^{-1}$ ]   | Estimated          |
| $k_{i3017}$ | Inhibitory concentration (IC50) of Snail to E-cadherin expression                                                         | 25.605 [nM]                                 | Estimated          |
| $k_{i530}$  | IC50 of GSK3 $\beta$ to the Snail activity                                                                                | 50 [nM]                                     | Estimated          |
| $V_{20}$    | Synthetic rate of Slug                                                                                                    | 4.457 [ $\text{nM}\cdot\text{min}^{-1}$ ]   | Estimated          |
| $k_{i3117}$ | IC50 of Slug to E-cadherin expression                                                                                     | 17.829 [nM]                                 | Estimated          |
| $k_{c526}$  | Rate constant for GSK3 $\beta$ phosphorylation by the active ERK                                                          | 0.12 [ $\text{nM}^{-1}\text{min}^{-1}$ ]    | Estimated          |
| $k_{r65}$   | Rate constant for GSK3 $\beta$ dephosphorylation                                                                          | 0.98 [ $\text{min}^{-1}$ ]                  | Estimated          |
| $Dsh^0$     | Total concentration of Dsh                                                                                                | 100 [nM]                                    | (11)               |

|               |                                     |          |      |
|---------------|-------------------------------------|----------|------|
| $APC^0$       | Total concentration of APC          | 100 [nM] | (11) |
| $TCF^0$       | Total concentration of TCF          | 15 [nM]  | (11) |
| $GSK3\beta^0$ | Total concentration of GSK3 $\beta$ | 50 [nM]  | (11) |

---

**ERK pathway**

---

|               |                                                                 |                                 |                    |
|---------------|-----------------------------------------------------------------|---------------------------------|--------------------|
| $k_{c18e}$    | Rate constant for activation of the SOS/Grb2 complex by EGF     | 0.2079[ $\text{min}^{-1}$ ]     | Estimated          |
| $k_{c1829}$   | Rate constant for Ras activation by PKC $\delta$                | 0.0173[ $\text{min}^{-1}$ ]     | Estimated          |
| $k_{i2618}$   | IC50 of the active ERK to SOS/GRB2 activation                   | 1.5[nM]                         | Estimated          |
| $k_{r18}$     | Rate constant for SOS/Grb2 deactivation                         | 0.0231[ $\text{min}^{-1}$ ]     | Estimated          |
| $v_{26}$      | Synthetic rate constant of Ras                                  | 4.3 [nM· $\text{min}^{-1}$ ]    | Estimated          |
| $k_{u19}$     | Basal degradation rate of Ras                                   | 0.0136[ $\text{min}^{-1}$ ]     | Estimated          |
| $k_{i1519}$   | IC50 of the $\beta$ -catenin/TCF complex to inhibition of LPDM  | 8.5 [nM]                        | Estimated          |
| $k_{c1819}$   | Rate constant for Ras activation by the active SOS/Grb2 complex | 9.8e-4[nM $^{-1}$ min $^{-1}$ ] | Modified from (12) |
| $v_{\max 20}$ | Rate constant for Ras deactivation                              | 0.2822 [min $^{-1}$ ]           | Modified from (12) |
| $k_{c2021}$   | Rate constant for Raf-1 activation by the active Ras            | 6.7e-4[nM $^{-1}$ min $^{-1}$ ] | Modified from (12) |
| $v_{\max 22}$ | Rate constant for Raf-1 deactivation                            | 0.143[ $\text{min}^{-1}$ ]      | Modified from (12) |
| $k_{c2223}$   | Rate constant for MEK activation                                | 6.7e-4[nM $^{-1}$ min $^{-1}$ ] | Modified from (12) |
| $k_{i2327}$   | IC of RKIP to MEK activation                                    | 120[nM]                         | Estimated          |
| $v_{\max 24}$ | Rate constant for MEK deactivation                              | 0.2316[ $\text{min}^{-1}$ ]     | Modified from (12) |
| $k_{c2425}$   | Rate constant for ERK activation                                | 8.8e-4[nM $^{-1}$ min $^{-1}$ ] | Modified from (12) |
| $v_{\max 26}$ | Rate constant for ERK deactivation                              | 0.3713[ $\text{min}^{-1}$ ]     | Modified from (12) |
| $k_{c2627}$   | Rate constant for RKIP phosphorylation                          | 78[nM $^{-1}$ min $^{-1}$ ]     | Modified from (12) |
| $v_{\max 28}$ | Rate constant for RKIP dephosphorylation                        | 240[ $\text{min}^{-1}$ ]        | Modified from (12) |
| $V_{38}$      | Synthetic rate constant of RKIP                                 | 27.72[nM·min $^{-1}$ ]          | Estimated          |
| $k_{i3027}$   | IC50 of Snail to RKIP expression                                | 25[nM]                          | Estimated          |
| $k_{i530}$    | IC50 of GSK3 $\beta$ to the Snail activity                      | 80[nM]                          | Estimated          |
| $k_{u27}$     | Degradation rate of RKIP                                        | 0.1155 [min $^{-1}$ ]           | Estimated          |
| $V_{40}$      | Rate constant for PKC $\delta$ activation                       | 0.0924[nM·min $^{-1}$ ]         | Estimated          |
| $k_{i529}$    | IC50 of GSK3 $\beta$ to the PKC $\delta$ activity               | 20[nM]                          | Estimated          |

|                        |                                                                               |                                             |           |
|------------------------|-------------------------------------------------------------------------------|---------------------------------------------|-----------|
| $k_{r29}$              | Rate constant for PKC $\delta$ deactivation                                   | 0.0231 [min <sup>-1</sup> ]                 | Estimated |
| $EGF^0$                | Basal activity of EGFR                                                        | 0.00231[nM·min <sup>-1</sup> ]              | Estimated |
| $Raf^0$                | Total concentration of Raf-1                                                  | 120 [nM]                                    | (12)      |
| $MEK^0$                | Total concentration of MEK                                                    | 360 [nM]                                    | (12)      |
| $ERK^0$                | Total concentration of ERK                                                    | 700 [nM]                                    | (12)      |
| <b>Gene regulation</b> |                                                                               |                                             |           |
| $k_{ct2630}$           | Transcription rate constant for Snail by the active ERK                       | 2.0775[nM <sup>-1</sup> min <sup>-1</sup> ] | Estimated |
| $k_{mt2630}$           | Half maximal concentration of Snail expression                                | 2.5[nM]                                     | Estimated |
| $k_{i30}$              | IC50 of GSK3 $\beta$ to Snail expression                                      | 80[nM]                                      | Estimated |
| $k_{u530}$             | Maximal degradation rate constant of Snail                                    | 0.043[min <sup>-1</sup> ]                   | Estimated |
| $k_{mu530}$            | Half maximal concentration of the Snail degradation                           | 20[nM]                                      | Estimated |
| $k_{ct2631}$           | Transcription rate constant for Slug by the active ERK                        | 2.0775[nM <sup>-1</sup> min <sup>-1</sup> ] | Estimated |
| $k_{mt2631}$           | Half maximal concentration of Slug expression                                 | 2.5[nM]                                     | Estimated |
| $k_{ct1531}$           | Transcription rate constant for Slug through the $\beta$ -catenin/TCF complex | 2.0775[nM <sup>-1</sup> min <sup>-1</sup> ] | Estimated |
| $k_{mt1531}$           | Half-maximal concentration of Slug expression                                 | 7.2[nM]                                     | Estimated |
| $k_{u31}$              | Degradation rate constant of Slug                                             | 0.051[min <sup>-1</sup> ]                   | Estimated |
| $k_{ct31}$             | Transcription rate constant for auto-activation                               | 2.0775[nM <sup>-1</sup> min <sup>-1</sup> ] | Estimated |
| $k_{mt31}$             | Half-maximal concentration of Slug for auto-activation                        | 80[nM]                                      | Estimated |
| $k_{ct1513}$           | Transcriptional rate constant for Axin by the $\beta$ -catenin/TCF complex    | 1.0e-4[nM <sup>-1</sup> min <sup>-1</sup> ] | Estimated |
| $k_{mt1513}$           | Half-maximal concentration of the $\beta$ -catenin/TCF complex                | 100[nM]                                     | Estimated |

## SUPPLEMENTARY REFERENCES

1. Kolch W. Ras/Raf signalling and emerging pharmacotherapeutic targets. Expert Opin Pharmacother. 2002;3:709-18.

2. Yeung K, Janosch P, McFerran B, Rose DW, Mischak H, Sedivy JM, et al. Mechanism of suppression of the Raf/MEK/extracellular signal-regulated kinase pathway by the raf kinase inhibitor protein. *Mol Cell Biol.* 2000;20:3079-85.
3. Yeung K, Seitz T, Li S, Janosch P, McFerran B, Kaiser C, et al. Suppression of Raf-1 kinase activity and MAP kinase signalling by RKIP. *Nature.* 1999;401:173-7.
4. Barrallo-Gimeno A, Nieto MA. The Snail genes as inducers of cell movement and survival: implications in development and cancer. *Development.* 2005;132:3151-61.
5. Batlle E, Sancho E, Franci C, Dominguez D, Monfar M, Baulida J, et al. The transcription factor snail is a repressor of E-cadherin gene expression in epithelial tumour cells. *Nat Cell Biol.* 2000;2:84-9.
6. Cano A, Perez-Moreno MA, Rodrigo I, Locascio A, Blanco MJ, del Barrio MG, et al. The transcription factor snail controls epithelial-mesenchymal transitions by repressing E-cadherin expression. *Nat Cell Biol.* 2000;2:76-83.
7. Peinado H, Olmeda D, Cano A. Snail, Zeb and bHLH factors in tumour progression: an alliance against the epithelial phenotype? *Nat Rev Cancer.* 2007;7:415-28.
8. Zhou BP, Deng J, Xia W, Xu J, Li YM, Gunduz M, et al. Dual regulation of Snail by GSK-3beta-mediated phosphorylation in control of epithelial-mesenchymal transition. *Nat Cell Biol.* 2004;6:931-40.
9. Peiro S, Escrava M, Puig I, Barbera MJ, Dave N, Herranz N, et al. Snail1 transcriptional repressor binds to its own promoter and controls its expression. *Nucleic Acids Res.* 2006;34:2077-84.
10. Sakai D, Suzuki T, Osumi N, Wakamatsu Y. Cooperative action of Sox9, Snail2 and PKA signaling in early neural crest development. *Development.* 2006;133:1323-33.
11. Lee E, Salic A, Kruger R, Heinrich R, Kirschner MW. The roles of APC and Axin derived from experimental and theoretical analysis of the Wnt pathway. *PLoS Biol.* 2003;1:E10.
12. Shin SY, Rath O, Choo SM, Fee F, McFerran B, Kolch W, et al. Positive- and negative-feedback regulations coordinate the dynamic behavior of the Ras-Raf-MEK-ERK signal transduction pathway. *J Cell Sci.* 2009;122:425-35.
