# Supplementary material
Source: PubMed Central journal article supplement (PMC3012452)
Supplement: NIHMS31681-supplement-4.pdf [file NIHMS31681-supplement-4.pdf]

# Supplementary Data D

Supplementary Table S1.

| SD<br>Feedback<br>combination<br>[F1F2F3F4F5] | Gradual increase of EGF from 0 to 1 |           |           |           |           | Gradual increase of Wnt from 0 to 1 |           |           |           |           | Gradual increase<br>of both EGF and<br>Wnt from 0 to 1 |
|-----------------------------------------------|-------------------------------------|-----------|-----------|-----------|-----------|-------------------------------------|-----------|-----------|-----------|-----------|--------------------------------------------------------|
|                                               | Wnt=0                               | 0.25      | 0.5       | 0.75      | 1         | EGF=0                               | 0.25      | 0.5       | 0.75      | 1         |                                                        |
| NNNNN                                         | 0.0762466                           | 0.0707544 | 0.0704348 | 0.0695557 | 0.0691935 | 0.2141232                           | 0.2089258 | 0.2086278 | 0.2089127 | 0.2089268 | 0.25862347                                             |
| NNNNC                                         | 0.2591449                           | 0.2618321 | 0.2605484 | 0.2608175 | 0.2609567 | 0.2067315                           | 0.2183198 | 0.2089973 | 0.2086726 | 0.2088219 | 0.377774946                                            |
| NNNCN                                         | 0.2858709                           | 0.2250465 | 0.2079387 | 0.2034979 | 0.2016761 | 0.1607729                           | 0.1134804 | 0.0768425 | 0.0564875 | 0.0430486 | 0.308408873                                            |
| NNNCC                                         | 0.4351354                           | 0.4006181 | 0.3813048 | 0.3754597 | 0.372791  | 0.2014446                           | 0.1655609 | 0.1050935 | 0.0712285 | 0.0507289 | 0.449074374                                            |
| NNCNN                                         | 0.1615713                           | 0.1562418 | 0.1515113 | 0.1509112 | 0.1500857 | 0.221808                            | 0.2219435 | 0.2171038 | 0.2140408 | 0.2119004 | 0.316410005                                            |
| NNCNC                                         | 0.207727                            | 0.2136076 | 0.2147637 | 0.2156234 | 0.2158992 | 0.2061707                           | 0.2199624 | 0.2221233 | 0.2182706 | 0.2143754 | 0.34788311                                             |
| NNCCN                                         | 0.2423902                           | 0.220211  | 0.2067126 | 0.2026526 | 0.200944  | 0.1995512                           | 0.1878369 | 0.1724444 | 0.1601577 | 0.1531399 | 0.333664132                                            |
| NNCCC                                         | 0.3013763                           | 0.2952839 | 0.2790967 | 0.2733741 | 0.270885  | 0.2023664                           | 0.2001636 | 0.1876533 | 0.1732606 | 0.1617656 | 0.381888018                                            |
| NCNNN                                         | 0.236224                            | 0.2328757 | 0.2301334 | 0.2299084 | 0.2296964 | 0.2157454                           | 0.2097269 | 0.2085989 | 0.2087127 | 0.2088504 | 0.362848572                                            |
| NCNNC                                         | 0.2606121                           | 0.2631085 | 0.2628724 | 0.2629149 | 0.2633419 | 0.2055476                           | 0.2107723 | 0.2101392 | 0.2085111 | 0.2087204 | 0.378674027                                            |
| NCNCN                                         | 0.418324                            | 0.3742524 | 0.357288  | 0.3526821 | 0.3504508 | 0.1953666                           | 0.1218269 | 0.0794245 | 0.0573513 | 0.0441978 | 0.431706782                                            |
| NCNCC                                         | 0.4382366                           | 0.4066298 | 0.3855268 | 0.3788443 | 0.375744  | 0.2045584                           | 0.1951444 | 0.112198  | 0.074018  | 0.0517908 | 0.452199718                                            |
| NCCNN                                         | 0.1886201                           | 0.1944281 | 0.1957829 | 0.1960252 | 0.1970523 | 0.2085301                           | 0.2152528 | 0.2226872 | 0.2206923 | 0.2165543 | 0.337096895                                            |
| NCCNC                                         | 0.1496491                           | 0.1612684 | 0.1651362 | 0.1674793 | 0.168221  | 0.2056503                           | 0.2074954 | 0.2140093 | 0.2218177 | 0.2217904 | 0.316121629                                            |
| NCCCN                                         | 0.2913508                           | 0.2828922 | 0.2681512 | 0.2634616 | 0.2612362 | 0.2015122                           | 0.2012667 | 0.1932563 | 0.176017  | 0.1626321 | 0.375011265                                            |
| NCCCC                                         | 0.2598875                           | 0.2634672 | 0.2456353 | 0.2398072 | 0.2371548 | 0.2046114                           | 0.2015279 | 0.2009386 | 0.1954386 | 0.1781841 | 0.360891878                                            |
| CNNNN                                         | 0.0345064                           | 0.0239802 | 0.0168896 | 0.0145523 | 0.0130314 | 0.2237762                           | 0.2124123 | 0.2102326 | 0.209755  | 0.209426  | 0.231888155                                            |
| CNNNC                                         | 0.2578461                           | 0.2577303 | 0.2524668 | 0.2504214 | 0.2488238 | 0.219798                            | 0.2333281 | 0.2128508 | 0.210419  | 0.2098766 | 0.377470163                                            |
| CNNCN                                         | 0.2929483                           | 0.2348397 | 0.22074   | 0.2162244 | 0.2135493 | 0.1621074                           | 0.1047807 | 0.0744711 | 0.0589706 | 0.0488749 | 0.317960218                                            |
| CNNCC                                         | 0.4775859                           | 0.4454801 | 0.4296894 | 0.4240147 | 0.420894  | 0.2270606                           | 0.1678611 | 0.0971077 | 0.069742  | 0.0543465 | 0.488673862                                            |
| CNCNN                                         | 0.1458739                           | 0.1221538 | 0.1085188 | 0.1010639 | 0.0966059 | 0.2570294                           | 0.2437207 | 0.2309694 | 0.2241875 | 0.2198207 | 0.312251044                                            |
| CNCNC                                         | 0.2277333                           | 0.2371665 | 0.2382197 | 0.240127  | 0.2411634 | 0.2117381                           | 0.2573542 | 0.2454688 | 0.2328775 | 0.2257452 | 0.36779569                                             |
| CNCCN                                         | 0.243514                            | 0.1978295 | 0.1738427 | 0.1648937 | 0.1599489 | 0.2393309                           | 0.209523  | 0.1834831 | 0.1659706 | 0.1547852 | 0.335478603                                            |
| CNCCC                                         | 0.344367                            | 0.3364004 | 0.3226196 | 0.3184953 | 0.3167431 | 0.2098788                           | 0.2449891 | 0.2100944 | 0.1856823 | 0.167722  | 0.415825805                                            |
| CCNNN                                         | 0.0801295                           | 0.0405088 | 0.0261325 | 0.0216181 | 0.0191887 | 0.2505083                           | 0.2139089 | 0.2105495 | 0.2097838 | 0.2094539 | 0.261611058                                            |
| CCNNC                                         | 0.2625494                           | 0.2649838 | 0.2651876 | 0.2656797 | 0.2658326 | 0.2059547                           | 0.3162502 | 0.215019  | 0.2109292 | 0.2097724 | 0.380468291                                            |
| CCNCN                                         | 0.3107445                           | 0.2439956 | 0.2271602 | 0.2215097 | 0.2185114 | 0.182552                            | 0.1093196 | 0.0755201 | 0.0597271 | 0.0494429 | 0.334580585                                            |
| CCNCC                                         | 0.4833303                           | 0.4588145 | 0.4449142 | 0.4408606 | 0.4390735 | 0.204977                            | 0.1928833 | 0.1004962 | 0.0709931 | 0.0551313 | 0.494050551                                            |
| CCCNN                                         | 0.2126863                           | 0.2139013 | 0.2057716 | 0.1991171 | 0.1941101 | 0.2459597                           | 0.2846742 | 0.2555911 | 0.238018  | 0.2289794 | 0.36049771                                             |
| CCCNC                                         | 0.2058736                           | 0.2280033 | 0.2357011 | 0.239303  | 0.2412923 | 0.2056274                           | 0.2313773 | 0.2849156 | 0.2622101 | 0.2410682 | 0.364225864                                            |
| CCCCN                                         | 0.3361588                           | 0.3117173 | 0.2856262 | 0.2728786 | 0.2636819 | 0.2574228                           | 0.2724715 | 0.2079374 | 0.1805592 | 0.1633172 | 0.407975105                                            |
| CCCCC                                         | 0.3377754                           | 0.3418005 | 0.3285051 | 0.3247414 | 0.3234779 | 0.2048354                           | 0.2370329 | 0.2757775 | 0.2118622 | 0.1832895 | 0.417880453                                            |

※ Each output in SD was normalized by its maximal value.

※ C means that the corresponding feedback link is connected and N means that link is not connected.

Supplementary Table S2.

| STI<br>Feedback<br>combination | Gradual increase of EGF from 0 to 1 |           |           |           |           | Gradual increase of Wnt from 0 to 1 |           |           |           |           | Gradual increase<br>of EGF and Wnt<br>from 0 to 1 |
|--------------------------------|-------------------------------------|-----------|-----------|-----------|-----------|-------------------------------------|-----------|-----------|-----------|-----------|---------------------------------------------------|
|                                | Wnt=0                               | 0.25      | 0.5       | 0.75      | 1         | EGF=0                               | 0.25      | 0.5       | 0.75      | 1         |                                                   |
| NNNNN                          | 0.2413793                           | 0.2413793 | 0.2758621 | 0.2758621 | 0.2758621 | 0.3103448                           | 0.3103448 | 0.3103448 | 0.3103448 | 0.3103448 | 0.275862069                                       |
| NNNNC                          | 0.2068966                           | 0.2068966 | 0.2068966 | 0.2068966 | 0.1724138 | 0.2758621                           | 0.3103448 | 0.3448276 | 0.3103448 | 0.3448276 | 0.206896552                                       |
| NNNCN                          | 0.4827586                           | 0.5172414 | 0.5517241 | 0.5517241 | 0.5517241 | 0.2413793                           | 0.2413793 | 0.2413793 | 0.2758621 | 0.2758621 | 0.344827586                                       |
| NNNCC                          | 0.2758621                           | 0.2758621 | 0.2413793 | 0.2413793 | 0.2413793 | 0.2758621                           | 0.2413793 | 0.2413793 | 0.2413793 | 0.2758621 | 0.206896552                                       |
| NNCNN                          | 0.4827586                           | 0.4827586 | 0.4827586 | 0.4827586 | 0.4827586 | 0.3103448                           | 0.3103448 | 0.3103448 | 0.3103448 | 0.3103448 | 0.344827586                                       |
| NNCNC                          | 0.4827586                           | 0.4482759 | 0.4827586 | 0.4482759 | 0.4482759 | 0.2758621                           | 0.3103448 | 0.3103448 | 0.3103448 | 0.3103448 | 0.379310345                                       |
| NNCCN                          | 0.5172414                           | 0.4827586 | 0.4827586 | 0.4827586 | 0.4827586 | 0.2413793                           | 0.2413793 | 0.2413793 | 0.2413793 | 0.2413793 | 0.310344828                                       |
| NNCCC                          | 0.4827586                           | 0.4482759 | 0.4482759 | 0.4482759 | 0.4482759 | 0.3103448                           | 0.2413793 | 0.2413793 | 0.2068966 | 0.2413793 | 0.379310345                                       |
| NCNNN                          | 0.1034483                           | 0.1034483 | 0.1034483 | 0.1034483 | 0.1034483 | 0.2758621                           | 0.3448276 | 0.3103448 | 0.3103448 | 0.3103448 | 0.172413793                                       |
| NCNNC                          | 0.1034483                           | 0.137931  | 0.137931  | 0.137931  | 0.137931  | 0.2758621                           | 0.2758621 | 0.3103448 | 0.3103448 | 0.3103448 | 0.275862069                                       |
| NCNCN                          | 0.2413793                           | 0.2068966 | 0.2068966 | 0.2068966 | 0.2068966 | 0.2413793                           | 0.2413793 | 0.2413793 | 0.2758621 | 0.2758621 | 0.137931034                                       |
| NCNCC                          | 0.1724138                           | 0.137931  | 0.137931  | 0.1034483 | 0.1034483 | 0.3103448                           | 0.2413793 | 0.2413793 | 0.2413793 | 0.2758621 | 0.206896552                                       |
| NCCNN                          | 0.4482759                           | 0.4482759 | 0.4482759 | 0.4827586 | 0.4827586 | 0.2758621                           | 0.2758621 | 0.3103448 | 0.3103448 | 0.3103448 | 0.448275862                                       |
| NCCNC                          | 0.4137931                           | 0.3793103 | 0.4137931 | 0.4137931 | 0.4137931 | 0.2758621                           | 0.2758621 | 0.2758621 | 0.3103448 | 0.3103448 | 0.551724138                                       |
| NCCCN                          | 0.4137931                           | 0.4137931 | 0.4482759 | 0.4137931 | 0.4137931 | 0.2758621                           | 0.2758621 | 0.2413793 | 0.2068966 | 0.2413793 | 0.413793103                                       |
| NCCCC                          | 0.4137931                           | 0.4137931 | 0.3793103 | 0.3793103 | 0.3793103 | 0.3103448                           | 0.2758621 | 0.2758621 | 0.2413793 | 0.2758621 | 0.620689655                                       |
| CNNNN                          | 0.2413793                           | 0.3103448 | 0.3103448 | 0.2413793 | 0.2758621 | 0.3103448                           | 0.3103448 | 0.3103448 | 0.3103448 | 0.3103448 | 0.310344828                                       |
| CNNNC                          | 0.137931                            | 0.1034483 | 0.137931  | 0.1034483 | 0.1034483 | 0.3103448                           | 0.3103448 | 0.3103448 | 0.3103448 | 0.3103448 | 0.172413793                                       |
| CNNCN                          | 0.4827586                           | 0.5517241 | 0.5517241 | 0.5517241 | 0.5517241 | 0.2758621                           | 0.3448276 | 0.3448276 | 0.3793103 | 0.3793103 | 0.413793103                                       |
| CNNCC                          | 0.2068966                           | 0.2413793 | 0.2413793 | 0.2413793 | 0.2413793 | 0.3103448                           | 0.3103448 | 0.3448276 | 0.3793103 | 0.3793103 | 0.172413793                                       |
| CNCNN                          | 0.4137931                           | 0.4137931 | 0.4137931 | 0.4137931 | 0.4137931 | 0.3448276                           | 0.3448276 | 0.3103448 | 0.3103448 | 0.3103448 | 0.275862069                                       |
| CNCNC                          | 0.4137931                           | 0.3448276 | 0.3103448 | 0.3103448 | 0.3103448 | 0.3103448                           | 0.3448276 | 0.3103448 | 0.3103448 | 0.3448276 | 0.275862069                                       |
| CNCCN                          | 0.4827586                           | 0.4827586 | 0.4827586 | 0.4827586 | 0.5172414 | 0.2758621                           | 0.2413793 | 0.2758621 | 0.2758621 | 0.2758621 | 0.275862069                                       |
| CNCCC                          | 0.4137931                           | 0.3793103 | 0.3448276 | 0.3103448 | 0.3103448 | 0.3103448                           | 0.2758621 | 0.2758621 | 0.2758621 | 0.2758621 | 0.24137931                                        |
| CCNNN                          | 0.137931                            | 0.1724138 | 0.2068966 | 0.2068966 | 0.2068966 | 0.3103448                           | 0.3103448 | 0.3103448 | 0.3103448 | 0.3103448 | 0.275862069                                       |
| CCNNC                          | 0.0689655                           | 0.1034483 | 0.0689655 | 0.0689655 | 0.0689655 | 0.2758621                           | 0.2413793 | 0.3103448 | 0.3448276 | 0.3103448 | 0.137931034                                       |

|       |           |           |           |           |           |           |           |           |           |           |             |
|-------|-----------|-----------|-----------|-----------|-----------|-----------|-----------|-----------|-----------|-----------|-------------|
| CCNCN | 0.4827586 | 0.5172414 | 0.5517241 | 0.5517241 | 0.5517241 | 0.2758621 | 0.3448276 | 0.3448276 | 0.3793103 | 0.3793103 | 0.413793103 |
| CCNCC | 0.137931  | 0.1034483 | 0.1034483 | 0.1034483 | 0.1034483 | 0.3103448 | 0.2758621 | 0.3448276 | 0.3793103 | 0.3793103 | 0.068965517 |
| CCCNN | 0.4137931 | 0.3793103 | 0.3103448 | 0.3448276 | 0.3103448 | 0.3448276 | 0.3448276 | 0.3103448 | 0.3103448 | 0.3103448 | 0.275862069 |
| CCCNC | 0.3793103 | 0.3793103 | 0.3448276 | 0.3103448 | 0.3103448 | 0.2758621 | 0.3103448 | 0.3448276 | 0.3103448 | 0.3103448 | 0.379310345 |
| CCCCN | 0.3448276 | 0.3103448 | 0.3103448 | 0.3103448 | 0.3103448 | 0.3448276 | 0.2413793 | 0.2758621 | 0.2758621 | 0.2758621 | 0.206896552 |
| CCCCC | 0.3103448 | 0.2758621 | 0.2758621 | 0.2413793 | 0.2413793 | 0.3103448 | 0.3448276 | 0.2413793 | 0.2758621 | 0.2758621 | 0.310344828 |

Supplementary Table S3.

| EC50<br>Feedback<br>combination | Gradual increase of EGF from 0 to 1 |           |           |           |           | Gradual increase of Wnt from 0 to 1 |           |           |           |           | Gradual increase<br>of EGF and Wnt<br>from 0 to 1 |
|---------------------------------|-------------------------------------|-----------|-----------|-----------|-----------|-------------------------------------|-----------|-----------|-----------|-----------|---------------------------------------------------|
|                                 | Wnt=0                               | 0.25      | 0.5       | 0.75      | 1         | EGF=0                               | 0.25      | 0.5       | 0.75      | 1         |                                                   |
| NNNNN                           | 0.0517241                           | 0.1206897 | 0.1206897 | 0.1206897 | 0.1206897 | 0.1206897                           | 0.1551724 | 0.1896552 | 0.1551724 | 0.1896552 | 0.051724138                                       |
| NNNNC                           | 0.0517241                           | 0.1551724 | 0.1551724 | 0.1551724 | 0.1551724 | 0.1551724                           | 0.1551724 | 0.1551724 | 0.1896552 | 0.1896552 | 0.120689655                                       |
| NNNCN                           | 0.0862069                           | 0.2241379 | 0.2241379 | 0.2241379 | 0.2241379 | 0.1896552                           | 0.0862069 | 0.0862069 | 0.0862069 | 0.0862069 | 0.155172414                                       |
| NNNCC                           | 0.0862069                           | 0.1551724 | 0.1551724 | 0.1551724 | 0.1551724 | 0.1896552                           | 0.1206897 | 0.0862069 | 0.0862069 | 0.0862069 | 0.086206897                                       |
| NNCNN                           | 0.0862069                           | 0.2586207 | 0.2586207 | 0.2586207 | 0.2586207 | 0.1551724                           | 0.1551724 | 0.1551724 | 0.1896552 | 0.1551724 | 0.155172414                                       |
| NNCNC                           | 0.0862069                           | 0.3275862 | 0.3275862 | 0.2931034 | 0.2931034 | 0.1551724                           | 0.1896552 | 0.1551724 | 0.1551724 | 0.1551724 | 0.086206897                                       |
| NNCCN                           | 0.1206897                           | 0.2586207 | 0.2586207 | 0.2586207 | 0.2586207 | 0.1896552                           | 0.1206897 | 0.1206897 | 0.0862069 | 0.0862069 | 0.120689655                                       |
| NNCCC                           | 0.1551724                           | 0.2931034 | 0.2931034 | 0.2931034 | 0.2931034 | 0.1896552                           | 0.1206897 | 0.1206897 | 0.1206897 | 0.1206897 | 0.155172414                                       |
| NCNNN                           | 0.1551724                           | 0.0862069 | 0.0862069 | 0.0862069 | 0.0517241 | 0.1551724                           | 0.1551724 | 0.1551724 | 0.1896552 | 0.1896552 | 0.120689655                                       |
| NCNNC                           | 0.1896552                           | 0.362069  | 0.362069  | 0.362069  | 0.362069  | 0.1551724                           | 0.1896552 | 0.1551724 | 0.1551724 | 0.1896552 | 0.155172414                                       |
| NCNCN                           | 0.2241379                           | 0.0517241 | 0.0517241 | 0.0517241 | 0.0517241 | 0.0862069                           | 0.0862069 | 0.0862069 | 0.0862069 | 0.0862069 | 0.120689655                                       |
| NCNCC                           | 0.2241379                           | 0.2931034 | 0.2931034 | 0.2931034 | 0.2931034 | 0.1206897                           | 0.1206897 | 0.0862069 | 0.0862069 | 0.0862069 | 0.155172414                                       |
| NCCNN                           | 0.2241379                           | 0.5       | 0.4655172 | 0.4655172 | 0.4655172 | 0.1551724                           | 0.1896552 | 0.1551724 | 0.1551724 | 0.1551724 | 0.155172414                                       |
| NCCNC                           | 0.2241379                           | 0.6724138 | 0.6724138 | 0.6724138 | 0.6724138 | 0.1206897                           | 0.1896552 | 0.1896552 | 0.1551724 | 0.1551724 | 0.120689655                                       |
| NCCCN                           | 0.2241379                           | 0.4310345 | 0.4310345 | 0.4310345 | 0.4310345 | 0.1551724                           | 0.1206897 | 0.1206897 | 0.1206897 | 0.0862069 | 0.155172414                                       |
| NCCCC                           | 0.2241379                           | 0.637931  | 0.6724138 | 0.6724138 | 0.6724138 | 0.1206897                           | 0.1551724 | 0.1206897 | 0.1206897 | 0.1206897 | 0.120689655                                       |
| CNNNN                           | 0.2586207                           | 0.1206897 | 0.1206897 | 0.1206897 | 0.1206897 | 0.1896552                           | 0.1551724 | 0.1551724 | 0.1896552 | 0.1551724 | 0.189655172                                       |
| CNNNC                           | 0.2586207                           | 0.0862069 | 0.0862069 | 0.0517241 | 0.0517241 | 0.1551724                           | 0.1551724 | 0.1551724 | 0.1896552 | 0.1551724 | 0.120689655                                       |
| CNNCN                           | 0.2931034                           | 0.2931034 | 0.2931034 | 0.3275862 | 0.3275862 | 0.1551724                           | 0.1206897 | 0.1206897 | 0.1551724 | 0.1551724 | 0.189655172                                       |
| CNNCC                           | 0.2931034                           | 0.0862069 | 0.0862069 | 0.0517241 | 0.0517241 | 0.1206897                           | 0.1206897 | 0.1206897 | 0.1551724 | 0.1551724 | 0.155172414                                       |
| CNCNN                           | 0.2931034                           | 0.1896552 | 0.1896552 | 0.1896552 | 0.1896552 | 0.1896552                           | 0.1551724 | 0.1551724 | 0.1551724 | 0.1551724 | 0.293103448                                       |
| CNCNC                           | 0.2931034                           | 0.2241379 | 0.1896552 | 0.1551724 | 0.1551724 | 0.1896552                           | 0.1551724 | 0.1551724 | 0.1551724 | 0.1551724 | 0.189655172                                       |
| CNCCN                           | 0.3275862                           | 0.2241379 | 0.2241379 | 0.2241379 | 0.2241379 | 0.1551724                           | 0.1206897 | 0.1206897 | 0.1206897 | 0.0862069 | 0.189655172                                       |
| CNCCC                           | 0.3275862                           | 0.1896552 | 0.1551724 | 0.1551724 | 0.1551724 | 0.1896552                           | 0.1206897 | 0.1206897 | 0.1206897 | 0.0862069 | 0.189655172                                       |
| CCNNN                           | 0.362069                            | 0.0517241 | 0.0862069 | 0.0862069 | 0.0862069 | 0.1896552                           | 0.1551724 | 0.1551724 | 0.1896552 | 0.1896552 | 0.224137931                                       |
| CCNNC                           | 0.362069                            | 0.1896552 | 0.1896552 | 0.1551724 | 0.1551724 | 0.1896552                           | 0.1206897 | 0.1551724 | 0.1551724 | 0.1896552 | 0.293103448                                       |
| CCNCN                           | 0.4655172                           | 0.2586207 | 0.2931034 | 0.2931034 | 0.2931034 | 0.1551724                           | 0.1206897 | 0.1551724 | 0.1551724 | 0.1551724 | 0.25862069                                        |

|       |           |           |           |           |           |           |           |           |           |           |             |
|-------|-----------|-----------|-----------|-----------|-----------|-----------|-----------|-----------|-----------|-----------|-------------|
| CCNCC | 0.4655172 | 0.1551724 | 0.1206897 | 0.1206897 | 0.1206897 | 0.1551724 | 0.1206897 | 0.1206897 | 0.1551724 | 0.1551724 | 0.293103448 |
| CCCNN | 0.5       | 0.2241379 | 0.1896552 | 0.1551724 | 0.1551724 | 0.1896552 | 0.1551724 | 0.1551724 | 0.1551724 | 0.1551724 | 0.25862069  |
| CCCNC | 0.5689655 | 0.4655172 | 0.3965517 | 0.3965517 | 0.362069  | 0.1896552 | 0.1896552 | 0.1896552 | 0.1551724 | 0.1551724 | 0.293103448 |
| CCCCN | 0.6724138 | 0.1551724 | 0.1551724 | 0.1206897 | 0.1206897 | 0.1551724 | 0.1206897 | 0.1206897 | 0.1206897 | 0.0862069 | 0.327586207 |
| CCCCC | 0.7068966 | 0.3965517 | 0.362069  | 0.3275862 | 0.3275862 | 0.1896552 | 0.1551724 | 0.1206897 | 0.1206897 | 0.1206897 | 0.293103448 |

---
